# Supplementary material for: Epigenetic Editing of Ascl1 Gene in Neural Stem Cells by Optogenetics
Source: PubMed Central journal article supplement (PMC5299429; doi:10.1038/srep42047), 2017-02-09
Supplement: srep42047-s1.pdf [file srep42047-s1.pdf]

## Supplementary information

### Epigenetic Editing of *Asc1* Gene in Neural Stem Cells by Optogenetics

Chiao-Ling Lo<sup>1</sup>, Samrat Roy Choudhury<sup>3</sup>, Joseph Irudayaraj<sup>3</sup>, Feng C. Zhou<sup>1,2</sup>

<sup>1</sup>Department of Anatomy & Cell Biology, Indiana University School of Medicine

<sup>2</sup>Stark Institute of Neuroscience Research, Indiana University School of Medicine

<sup>3</sup>Agricultural & Biological Engineering, Purdue University

## Supplementary Figure 1

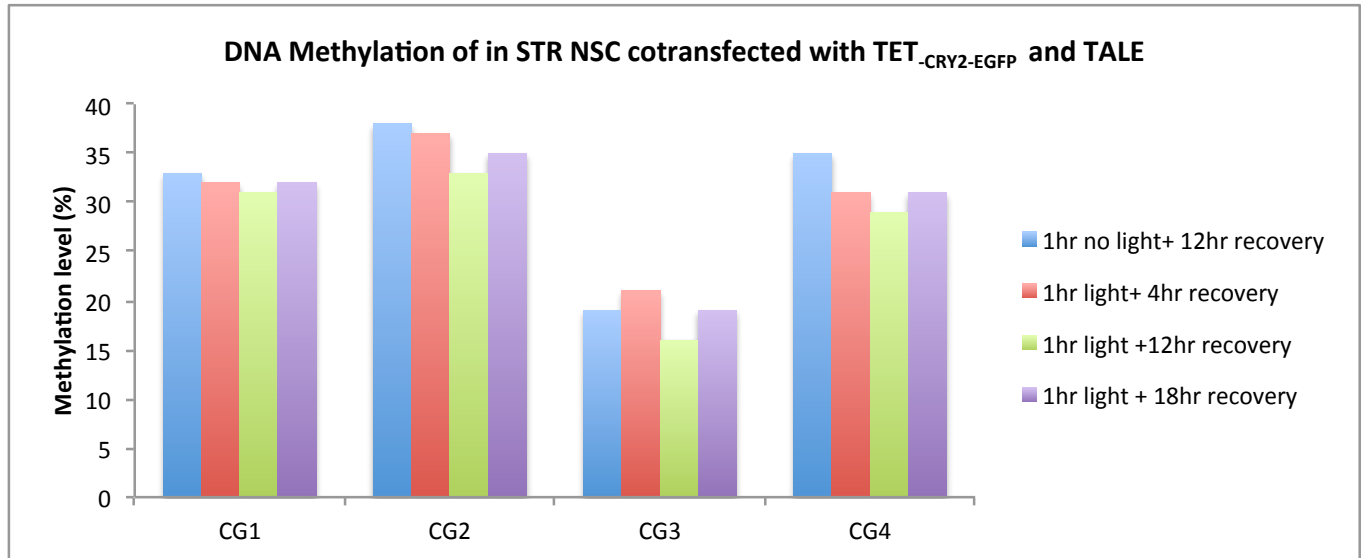

**Supplementary Figure 1.** Comparison of DNA methylation levels in STR neural stem cells at different timeframes post-light treatment. TET1<sub>-CRY2-EGFP</sub> and TALE co-transfected STR cells were divided into 4 groups for the following treatment: (1) no light treatment with 12 hour recovery, (2) 1-hour light treatment followed by 4 hour, (3) 12 hour, (4) 18 hour recovery before cell isolation to access the duration of DNA methylation changes. Methylation levels were assessed by pyrosequencing in the TALE target sites.

**Ascl1 CpG methylation**

| Location                       | 3'end    |          |          |          |          |          |          |          |          |          | End of exon2 |
|--------------------------------|----------|----------|----------|----------|----------|----------|----------|----------|----------|----------|--------------|
| CpG No.                        | 1        | 2        | 3        | 4        | 5        | 6        | 7        | 8        | 9        | 10       | 11 new CpG   |
| Genomic position (Rn 5.0) Chr7 | 28152246 | 28152248 | 28152270 | 28152303 | 28152334 | 28152351 | 28152362 | 28152394 | 28152411 | 28152424 | 28152471     |
| DRG undiff-1                   | <1       | <1       | 1.43     | <1       | <1       | <1       | <1       | <1       | <1       | <1       | <1           |
| DRG undiff-2                   | <1       | <1       | <1       | <1       | <1       | <1       | <1       | <1       | <1       | <1       | <1           |
| DRG undiff-3                   | <1       | <1       | <1       | <1       | <1       | <1       | <1       | <1       | <1       | <1       | <1           |
| DRG diff-1                     | <1       | <1       | <1       | <1       | 1.13     | <1       | <1       | <1       | <1       | <1       | <1           |
| DRG diff-2                     | <1       | <1       | <1       | <1       | <1       | <1       | <1       | <1       | 2.09     | 1.92     | <1           |
| DRG diff-3                     | <1       | <1       | <1       | <1       | <1       | <1       | <1       | <1       | <1       | <1       | <1           |
| striatal undiff-1              | 43.33    | 46.71    | 40.67    | 38.89    | 37.64    | 32.98    | 34.14    | 33.10    | 37.80    | 31.68    | 19.60        |
| striatal undiff-2              | 41.42    | 46.67    | 39.42    | 36.75    | 39.91    | 33.27    | 33.61    | 33.27    | 36.57    | 33.44    | 21.58        |
| striatal undiff-3              | 44.30    | 46.93    | 42.29    | 39.88    | 42.27    | 37.73    | 37.00    | 38.80    | 39.52    | 36.12    | 22.95        |
| STR und Ave                    | 43.02    | 46.77    | 40.79    | 38.51    | 39.94    | 34.66    | 34.92    | 35.06    | 37.97    | 33.74    | 21.38        |
| striatal diff-1                | 31.53    | 35.07    | 35.19    | 29.04    | 24.40    | 24.37    | 25.66    | 22.75    | 38.06    | 39.45    | 11.30        |
| striatal diff-2                | 36.13    | 37.95    | 34.11    | 30.85    | 33.78    | 36.95    | 29.58    | 28.78    | 45.05    | 36.36    | 29.43        |
| striatal diff-3                | 46.15    | 46.15    | 48.08    | 43.15    | 46.97    | 38.78    | 41.70    | 35.21    | 47.18    | 38.67    | 26.83        |
| STR Diff Ave                   | 37.94    | 39.72    | 39.13    | 34.35    | 35.05    | 33.37    | 32.31    | 28.91    | 43.43    | 38.16    | 22.52        |
| T-test STR und:dif             | 0.313    | 0.101    | 0.733    | 0.410    | 0.505    | 0.800    | 0.626    | 0.204    | 0.131    | 0.050    | 0.852        |

| Methylation level | p-value     |
|-------------------|-------------|
| 0-10%             | p<0.05      |
| 10-20%            | 0.05<p<0.07 |
| 20-35%            |             |
| 35-50%            |             |
| >50%              |             |

| intron 1 |          |          |          | exon1    |          |          |          |          |          |          |          |
|----------|----------|----------|----------|----------|----------|----------|----------|----------|----------|----------|----------|
| 12       | 13       | 14       | 15       | 16       | 17       | 18       | 19       | 20       | 21       | 22       | 23       |
| 28152560 | 28152563 | 28152637 | 28152843 | 28152845 | 28152881 | 28153037 | 28153049 | 28153052 | 28153065 | 28153071 | 28153080 |
| 1.06     | <1       | <1       | <1       | <1       | <1       | 8.46     | <1       | <1       | <1       | <1       | <1       |
| <1       | <1       | <1       | <1       | <1       | <1       | 8.35     | <1       | <1       | <1       | 1.63     | <1       |
| <1       | <1       | <1       | <1       | <1       | <1       | 5.34     | <1       | <1       | <1       | 1.27     | <1       |
| <1       | <1       | <1       | <1       | <1       | <1       | 6.02     | <1       | <1       | <1       | <1       | <1       |
| <1       | <1       | <1       | 1.17     | <1       | 5.91     | 5.89     | <1       | 1.99     | <1       | <1       | <1       |
| <1       | <1       | <1       | <1       | <1       | <1       | 7.26     | <1       | 1.41     | <1       | <1       | <1       |
| 15.23    | 27.49    | 32.29    | 22.81    | 21.16    | 23.38    | 19.73    | 21.70    | 24.94    | 22.43    | 37.09    | 25.06    |
| 17.52    | 24.41    | 35.38    | 26.18    | 25.00    | 27.29    | 11.07    | 9.47     | 12.42    | 12.20    | 21.97    | 12.10    |
| 20.38    | 31.43    | 36.31    | 27.74    | 26.13    | 27.19    | 21.76    | 21.15    | 22.95    | 23.59    | 32.65    | 21.96    |
| 17.71    | 27.77    | 34.66    | 25.58    | 24.10    | 25.95    | 17.52    | 17.44    | 20.10    | 19.41    | 30.57    | 19.71    |
| 9.99     | 14.79    | 20.13    | 23.74    | 19.45    | 28.39    | 20.19    | 15.59    | 18.97    | 14.53    | 22.83    | 13.34    |
| 9.77     | 14.88    | 35.18    | 23.90    | 22.16    | 27.01    | 17.85    | 11.33    | 15.36    | 16.80    | 20.48    | 11.10    |
| 17.44    | 27.28    | 44.51    | 26.24    | 25.63    | 26.80    | 16.01    | 12.47    | 17.14    | 15.86    | 22.55    | 11.29    |
| 12.40    | 18.98    | 33.27    | 24.63    | 22.41    | 27.40    | 18.02    | 13.13    | 17.16    | 15.73    | 21.95    | 11.91    |
| 0.144    | 0.130    | 0.857    | 0.599    | 0.511    | 0.354    | 0.893    | 0.361    | 0.505    | 0.374    | 0.131    | 0.121    |

| 24       | 25       | 26       | 27       | 28       | 29       | 30       | 31       | 32       | 33       | 34       | 35       |
|----------|----------|----------|----------|----------|----------|----------|----------|----------|----------|----------|----------|
| 28153097 | 28153125 | 28153133 | 28153137 | 28153151 | 28153158 | 28153163 | 28153169 | 28153188 | 28153190 | 28153192 | 28153202 |
| <1       | <1       | <1       | <1       | <1       | <1       | <1       | <1       | <1       | <1       | <1       | <1       |
| <1       | <1       | <1       | <1       | <1       | <1       | <1       | <1       | <1       | <1       | <1       | <1       |
| <1       | <1       | <1       | <1       | <1       | <1       | <1       | <1       | <1       | <1       | <1       | <1       |
| <1       | <1       | <1       | <1       | <1       | <1       | <1       | <1       | <1       | <1       | <1       | <1       |
| <1       | <1       | <1       | <1       | <1       | <1       | <1       | <1       | <1       | <1       | <1       | <1       |
| <1       | <1       | <1       | <1       | <1       | <1       | <1       | <1       | <1       | <1       | <1       | <1       |
| 25.43    | 21.27    | 22.22    | 23.34    | 24.59    | 22.79    | 18.91    | 24.00    | 13.59    | 12.52    | 14.17    | 21.63    |
| 13.88    | 12.84    | 13.57    | 13.77    | 16.64    | 15.15    | 9.32     | 12.77    | 7.73     | 6.68     | 7.90     | 13.49    |
| 21.34    | 20.64    | 22.39    | 24.29    | 23.61    | 23.32    | 19.85    | 20.88    | 12.31    | 12.31    | 12.31    | 21.28    |
| 20.22    | 18.25    | 19.39    | 20.47    | 21.61    | 20.42    | 16.03    | 19.22    | 11.21    | 10.50    | 11.46    | 18.80    |
| 14.13    | 12.06    | 12.37    | 19.58    | 23.72    | 23.87    | 18.31    | 19.64    | 9.40     | 9.40     | 9.40     | 14.27    |
| 17.69    | 13.00    | 14.61    | 14.92    | 21.27    | 17.60    | 13.45    | 17.53    | 8.11     | 8.11     | 8.11     | 12.07    |
| 14.20    | 15.25    | 17.65    | 17.87    | 17.79    | 16.90    | 10.95    | 14.15    | 9.20     | 7.46     | 9.93     | 14.17    |
| 15.34    | 13.44    | 14.88    | 17.46    | 20.92    | 19.46    | 14.24    | 17.11    | 8.90     | 8.33     | 9.15     | 13.50    |
| 0.244    | 0.169    | 0.242    | 0.453    | 0.832    | 0.794    | 0.678    | 0.600    | 0.274    | 0.337    | 0.298    | 0.127    |

| 36       | 37       | 38       | 39       | 40       | 41       | 42       | 43       | 44       | 45       | 46       | 47       |
|----------|----------|----------|----------|----------|----------|----------|----------|----------|----------|----------|----------|
| 28153206 | 28153209 | 28153213 | 28153218 | 28153250 | 28153253 | 28153270 | 28153306 | 28153312 | 28153316 | 28153318 | 28153322 |
| <1       | <1       | <1       | <1       | <1       | <1       | 5.91     | <1       | 1.09     | <1       | <1       | <1       |
| <1       | <1       | <1       | <1       | <1       | <1       | 3.96     | <1       | <1       | <1       | <1       | <1       |
| <1       | <1       | <1       | <1       | <1       | <1       | 3.94     | <1       | <1       | <1       | <1       | <1       |
| <1       | <1       | <1       | <1       | <1       | <1       | 1.66     | <1       | <1       | <1       | <1       | <1       |
| <1       | <1       | <1       | <1       | <1       | <1       | 3.13     | <1       | <1       | <1       | <1       | <1       |
| <1       | <1       | 1.07     | <1       | <1       | <1       | 5.58     | <1       | <1       | <1       | <1       | <1       |
| 21.80    | 23.82    | 20.32    | 22.73    | 12.90    | 15.46    | 29.42    | 19.06    | 20.13    | 16.64    | 15.30    | 19.25    |
| 16.15    | 15.92    | 12.53    | 16.44    | 4.32     | 9.03     | 18.75    | 11.90    | 15.99    | 10.46    | 8.36     | 9.99     |
| 22.23    | 24.35    | 19.73    | 22.48    | 12.90    | 15.24    | 28.82    | 18.25    | 19.67    | 18.66    | 17.15    | 19.68    |
| 20.06    | 21.36    | 17.52    | 20.55    | 10.04    | 13.24    | 25.66    | 16.41    | 18.60    | 15.25    | 13.60    | 16.31    |
| 15.03    | 14.18    | 10.11    | 10.42    | 7.02     | 9.90     | 21.27    | 12.42    | 13.15    | 9.02     | 7.78     | 13.03    |
| 11.88    | 10.89    | 12.60    | 10.37    | 8.04     | 7.95     | 20.02    | 15.20    | 15.81    | 11.61    | 10.76    | 11.86    |
| 13.57    | 15.22    | 12.77    | 14.38    | 8.25     | 9.21     | 21.11    | 12.81    | 16.27    | 12.20    | 8.52     | 13.21    |
| 13.49    | 13.43    | 11.83    | 11.72    | 7.77     | 9.02     | 20.80    | 13.48    | 15.08    | 10.95    | 9.02     | 12.70    |
| 0.038    | 0.058    | 0.098    | 0.023    | 0.475    | 0.125    | 0.235    | 0.293    | 0.097    | 0.180    | 0.180    | 0.321    |

| 48       | 49       | 50       | 51       | 52       | 53       | 54       | 55       | 56       | 57       | 58       | 59       |
|----------|----------|----------|----------|----------|----------|----------|----------|----------|----------|----------|----------|
| 28153327 | 28153330 | 28153332 | 28153337 | 28153344 | 28153370 | 28153390 | 28153393 | 28153402 | 28153412 | 28153422 | 28153426 |
| <1       | <1       | <1       | <1       | <1       | <1       | <1       | <1       | <1       | <1       | <1       | <1       |
| <1       | <1       | <1       | <1       | <1       | <1       | <1       | <1       | <1       | <1       | <1       | <1       |
| <1       | <1       | <1       | <1       | <1       | <1       | 1.17     | <1       | <1       | <1       | <1       | <1       |
| <1       | <1       | <1       | <1       | 1.08     | <1       | <1       | <1       | <1       | <1       | <1       | <1       |
| 1.37     | <1       | <1       | <1       | 1.15     | <1       | <1       | 1.04     | <1       | <1       | <1       | <1       |
| <1       | <1       | <1       | <1       | <1       | <1       | <1       | <1       | <1       | <1       | <1       | <1       |
| 15.97    | 4.72     | 5.45     | 32.29    | 35.00    | 25.90    | 19.48    | 14.40    | 18.64    | 16.95    | 14.59    | 13.46    |
| 10.99    | 3.37     | 3.22     | 19.41    | 21.45    | 15.46    | 10.77    | 7.34     | 9.98     | 6.82     | 8.16     | 7.08     |
| 14.13    | 4.31     | 7.20     | 30.76    | 33.57    | 24.13    | 17.00    | 13.56    | 16.31    | 13.77    | 12.82    | 10.94    |
| 13.70    | 4.13     | 5.29     | 27.49    | 30.00    | 21.83    | 15.75    | 11.77    | 14.98    | 12.51    | 11.85    | 10.49    |
| 6.29     | 4.48     | 4.77     | 18.35    | 19.05    | 17.43    | 9.77     | 5.94     | 8.62     | 12.83    | 9.98     | 10.11    |
| 7.00     | 1.58     | 4.16     | 17.98    | 20.64    | 20.08    | 15.23    | 11.51    | 15.36    | 15.86    | 16.12    | 14.74    |
| 10.35    | 2.09     | 4.12     | 18.03    | 22.32    | 16.39    | 11.53    | 6.74     | 11.97    | 9.37     | 6.69     | 5.42     |
| 7.88     | 2.72     | 4.35     | 18.12    | 20.67    | 17.97    | 12.17    | 8.06     | 11.98    | 12.69    | 10.93    | 10.09    |
| 0.039    | 0.223    | 0.467    | 0.082    | 0.101    | 0.320    | 0.306    | 0.260    | 0.408    | 0.964    | 0.797    | 0.908    |

| 60       | 61       | 62       | 63       | 64       | 65       | 66       | 67       | 68       | 69       | 70       | 71       |
|----------|----------|----------|----------|----------|----------|----------|----------|----------|----------|----------|----------|
| 28153432 | 28153449 | 28153463 | 28153481 | 28153485 | 28153491 | 28153503 | 28153506 | 28153518 | 28153521 | 28153545 | 28153547 |
| <1       | <1       | <1       | <1       | <1       | <1       | <1       | <1       | <1       | <1       | <1       | <1       |
| <1       | <1       | <1       | <1       | <1       | <1       | <1       | <1       | <1       | <1       | <1       | <1       |
| <1       | <1       | <1       | <1       | <1       | <1       | <1       | <1       | <1       | <1       | <1       | <1       |
| <1       | 2.43     | <1       | <1       | <1       | <1       | <1       | <1       | <1       | <1       | <1       | <1       |
| <1       | <1       | <1       | <1       | <1       | <1       | <1       | <1       | <1       | <1       | <1       | <1       |
| <1       | 1.10     | <1       | <1       | <1       | <1       | <1       | <1       | <1       | <1       | <1       | <1       |
| 16.00    | 16.78    | 16.57    | 17.20    | 14.72    | 20.50    | 19.80    | 14.66    | 18.15    | 12.92    | 17.72    | 15.75    |
| 8.69     | 6.84     | 8.03     | 9.02     | 6.82     | 9.76     | 11.04    | 7.62     | 9.90     | 7.56     | 7.61     | 8.15     |
| 13.25    | 14.83    | 16.99    | 16.11    | 11.88    | 17.37    | 16.91    | 13.04    | 16.38    | 12.11    | 15.17    | 12.02    |
| 12.65    | 12.82    | 13.86    | 14.11    | 11.14    | 15.88    | 15.92    | 11.78    | 14.81    | 10.86    | 13.50    | 11.97    |
| 11.21    | 6.84     | 8.41     | 6.64     | 6.20     | 3.53     | 2.48     | 2.22     | 7.80     | 2.00     | 1.67     | 1.68     |
| 17.76    | 18.59    | 12.24    | 13.58    | 6.59     | 14.54    | 16.24    | 5.19     | 20.51    | 15.09    | 19.99    | 18.59    |
| 5.56     | 7.34     | 7.14     | 7.84     | 4.70     | 7.38     | 4.51     | 4.00     | 3.41     | 4.13     | 8.76     | 5.37     |
| 11.51    | 10.92    | 9.26     | 9.35     | 5.83     | 8.48     | 7.74     | 3.81     | 10.57    | 7.08     | 10.14    | 8.55     |
| 0.796    | 0.719    | 0.235    | 0.228    | 0.089    | 0.178    | 0.178    | 0.026    | 0.499    | 0.436    | 0.613    | 0.573    |



| 72       | 73       | new CpG    | 74       | 75       | 76       | 77       | 78       | 79       | 80       | 81       | 82       |
|----------|----------|------------|----------|----------|----------|----------|----------|----------|----------|----------|----------|
| 28153560 | 28153566 | 28153569   | 28153572 | 28153575 | 28153578 | 28153581 | 28153583 | 28153587 | 28153590 | 28153592 | 28153596 |
| <1       | <1       | <1         | <1       | <1       | <1       | <1       | 1.19     | <1       | <1       | <1       | <1       |
| <1       | <1       | <1         | <1       | <1       | <1       | <1       | <1       | <1       | <1       | <1       | <1       |
| <1       | <1       | <1         | <1       | <1       | <1       | <1       | <1       | <1       | <1       | <1       | <1       |
| <1       | 1.74     | <1         | <1       | <1       | <1       | <1       | <1       | <1       | <1       | <1       | <1       |
| <1       | <1       | <1         | <1       | <1       | <1       | <1       | <1       | <1       | <1       | <1       | <1       |
| <1       | 1.49     | <1         | <1       | <1       | <1       | <1       | <1       | <1       | <1       | <1       | 1.28     |
| 15.97    | 15.07    | 21.2734864 | 15.54    | 17.21    | 10.68    | 13.35    | 12.12    | 10.42    | 9.39     | 6.08     | 20.89    |
| 10.24    | 7.00     | 13.450012  | 9.19     | 9.81     | 5.81     | 6.64     | 6.64     | 7.34     | 4.47     | 2.94     | 9.59     |
| 13.84    | 15.11    | 18.059519  | 16.13    | 16.25    | 10.18    | 11.03    | 9.81     | 11.23    | 9.21     | 5.15     | 19.34    |
| 13.35    | 12.39    | 17.59      | 13.62    | 14.42    | 8.89     | 10.34    | 9.52     | 9.66     | 7.69     | 4.72     | 16.61    |
|          | 6.95     | 7.12334524 | 6.87     | 1.67     |          | 1.37     | 6.77     | 6.04     | 10.01    | 1.00     | 5.49     |
| 23.39    | 22.36    | 21.89515   | 20.57    | 15.93    | 4.15     | 12.15    | 9.54     | 5.97     | 19.58    | 1.00     | 18.64    |
| 5.32     | 4.96     | 10.467033  | 6.83     | 7.02     | 6.00     | 3.89     | 3.89     | 3.97     | 7.39     | 1.00     | 7.44     |
| 14.35    | 11.42    | 13.16      | 11.42    | 8.20     | 5.08     | 5.80     | 6.74     | 5.32     | 12.33    | 1.00     | 10.52    |
| 0.896    | 0.881    | 0.427      | 0.688    | 0.262    | 0.169    | 0.299    | 0.288    | 0.034    | 0.315    | 0.016    | 0.324    |

5'UTR

| 83       | 84       | 85       | 86       | 87       | 88       | 89       | 90       | 91       | 92       | 93       | 94       |
|----------|----------|----------|----------|----------|----------|----------|----------|----------|----------|----------|----------|
| 28153617 | 28153632 | 28153641 | 28153652 | 28153658 | 28153701 | 28153703 | 28153713 | 28153733 | 28153753 | 28153761 | 28153768 |
| <1       | <1       | <1       | <1       | <1       | <1       | 1.28     | <1       | 7.29     | <1       | <1       | <1       |
| <1       | <1       | <1       | <1       | <1       | <1       | <1       | <1       | 16.71    | <1       | <1       | <1       |
| <1       | <1       | <1       | <1       | <1       | <1       | <1       | <1       | 7.77     | <1       | <1       | <1       |
| <1       | <1       | <1       | <1       | <1       | <1       | 1.37     | <1       | 28.51    | <1       | <1       | <1       |
| <1       | <1       | <1       | <1       | <1       | <1       | <1       | <1       | 6.21     | <1       | <1       | <1       |
| <1       | <1       | <1       | <1       | <1       | <1       | <1       | <1       | 7.04     | <1       | <1       | <1       |
| 12.30    | 17.93    | 15.31    | 11.88    | 18.22    | 6.87     | 18.25    | 9.74     | 16.10    | 8.87     | 15.82    | 10.48    |
| 5.58     | 8.74     | 6.72     | 6.37     | 9.20     | 3.60     | 4.86     | 4.34     | 11.96    | 6.59     | 15.02    | 9.50     |
| 10.36    | 14.96    | 14.11    | 11.94    | 17.68    | 7.43     | 9.58     | 10.08    | 17.02    | 6.25     | 14.06    | 8.59     |
| 9.41     | 13.88    | 12.05    | 10.06    | 15.04    | 5.96     | 10.90    | 8.05     | 15.03    | 7.24     | 14.97    | 9.52     |
| 2.00     | 7.70     | 8.25     | 2.28     | 6.98     | 3.13     | 5.34     | 5.13     | 10.77    | 3.53     | 11.69    | 5.90     |
| 7.38     | 12.86    | 9.14     | 10.16    | 16.05    | 5.17     | 5.17     | 6.13     | 13.03    | 8.95     | 16.03    | 15.25    |
| 4.74     | 6.04     | 6.65     | 4.87     | 4.99     | 2.83     | 5.50     | 3.25     | 9.69     | 4.81     | 13.05    | 5.66     |
| 4.70     | 8.87     | 8.02     | 5.77     | 9.34     | 3.71     | 5.33     | 4.83     | 11.16    | 5.76     | 13.59    | 8.94     |
| 0.136    | 0.214    | 0.221    | 0.221    | 0.273    | 0.183    | 0.229    | 0.190    | 0.104    | 0.465    | 0.374    | 0.864    |

| 95       | 96       | 97       | 98       | 99       | 100      | 101      | 102      | 103      | 104      | 105      | 106      |
|----------|----------|----------|----------|----------|----------|----------|----------|----------|----------|----------|----------|
| 28153781 | 28153812 | 28153837 | 28153839 | 28153870 | 28153892 | 28153905 | 28153908 | 28153930 | 28153933 | 28153935 | 28153945 |
| <1       | <1       | <1       | <1       | <1       | <1       | <1       | <1       | <1       | <1       | <1       | <1       |
| <1       | <1       | <1       | <1       | <1       | <1       | <1       | <1       | <1       | <1       | <1       | <1       |
| <1       | <1       | <1       | <1       | <1       | <1       | <1       | <1       | <1       | <1       | <1       | <1       |
| <1       | <1       | <1       | <1       | <1       | <1       | <1       | <1       | <1       | <1       | <1       | <1       |
| <1       | <1       | <1       | <1       | <1       | <1       | <1       | <1       | <1       | <1       | <1       | <1       |
| <1       | <1       | <1       | <1       | <1       | <1       | <1       | <1       | <1       | <1       | <1       | <1       |
| 13.00    | 13.06    | 6.97     | 9.83     | 14.43    | 8.41     | 9.16     | 1.00     | 5.37     | 11.67    | 7.87     | 13.18    |
| 12.45    | 10.64    | 4.67     | 8.96     | 9.31     | 6.76     | 8.71     | 7.56     | 4.26     | 6.95     | 6.27     | 7.53     |
| 11.41    | 10.42    | 5.04     | 7.67     | 11.26    | 7.29     | 8.37     | 7.69     | 3.32     | 5.56     | 6.80     | 9.79     |
| 12.28    | 11.37    | 5.56     | 8.82     | 11.67    | 7.49     | 8.74     | 5.42     | 4.32     | 8.06     | 6.98     | 10.16    |
| 6.99     | 4.09     | 6.40     | 6.40     | 7.01     | 5.87     | 6.95     | 5.47     | 1.42     | 3.00     | 1.00     | 2.16     |
| 13.52    | 12.20    | 3.16     | 3.16     | 9.12     | 1.00     | 1.00     | 1.00     | 1.85     | 9.26     | 1.00     | 5.30     |
| 7.19     | 8.40     | 3.24     | 3.24     | 9.52     | 3.31     | 4.96     | 4.26     | 4.12     | 4.81     | 2.89     | 5.15     |
| 9.24     | 8.23     | 4.27     | 4.27     | 8.55     | 3.39     | 4.30     | 3.58     | 2.46     | 5.69     | 1.63     | 4.20     |
| 0.237    | 0.276    | 0.372    | 0.021    | 0.138    | 0.051    | 0.065    | 0.515    | 0.145    | 0.418    | 0.002    | 0.037    |

| 107      | 108      | 109      | 110      | 111      | 112      | 113      | 114      | 115      | 116      | 117      | 118      |
|----------|----------|----------|----------|----------|----------|----------|----------|----------|----------|----------|----------|
| 28153954 | 28153956 | 28153961 | 28153965 | 28153967 | 28153973 | 28153977 | 28153980 | 28153983 | 28153986 | 28153994 | 28154029 |
| <1       | <1       | <1       | <1       | <1       | <1       | <1       | <1       | <1       | <1       | <1       | <1       |
| <1       | <1       | <1       | <1       | <1       | <1       | <1       | <1       | <1       | <1       | <1       | <1       |
| <1       | <1       | <1       | <1       | <1       | <1       | <1       | <1       | <1       | <1       | <1       | <1       |
| <1       | <1       | <1       | <1       | <1       | <1       | <1       | 1.18     | <1       | <1       | <1       | <1       |
| <1       | <1       | <1       | <1       | <1       | <1       | <1       | <1       | <1       | <1       | <1       | <1       |
| <1       | <1       | <1       | 1.11     | 1.31     | <1       | 1.25     | <1       | <1       | <1       | <1       | <1       |
| 6.91     | 6.18     | 5.84     | 9.05     | 5.33     | 13.23    | 13.11    | 10.77    | 16.13    | 11.95    | 12.35    | 9.42     |
| 6.52     | 3.60     | 6.68     | 6.42     | 4.90     | 9.96     | 11.00    | 10.36    | 11.08    | 8.27     | 9.64     | 8.81     |
| 5.11     | 3.54     | 5.27     | 7.58     | 4.91     | 9.99     | 10.42    | 10.04    | 15.83    | 9.66     | 12.88    | 7.70     |
| 6.18     | 4.44     | 5.93     | 7.68     | 5.05     | 11.06    | 11.51    | 10.39    | 14.35    | 9.96     | 11.62    | 8.64     |
| 1.15     | 1.15     | 1.00     | 4.41     | 1.56     | 5.82     | 4.82     | 9.14     | 11.22    | 5.06     | 6.45     | 4.83     |
| 1.94     | 1.94     | 2.68     | 7.33     | 7.33     | 8.09     | 4.69     | 4.41     | 4.65     | 5.60     | 8.20     | 4.35     |
| 1.74     | 1.74     | 1.50     | 2.81     | 2.81     | 5.57     | 5.89     | 6.31     | 5.52     | 4.54     | 6.25     | 5.70     |
| 1.61     | 1.61     | 1.73     | 4.85     | 3.90     | 6.49     | 5.13     | 6.62     | 7.13     | 5.07     | 6.96     | 4.96     |
| 0.002    | 0.035    | 0.003    | 0.137    | 0.549    | 0.028    | 0.002    | 0.053    | 0.052    | 0.012    | 0.017    | 0.005    |

| 119      | 120      | 121      | 122      | 123      | 124      | 125      | 126      | 127      | 128      | 129      | 130      |
|----------|----------|----------|----------|----------|----------|----------|----------|----------|----------|----------|----------|
| 28154041 | 28154044 | 28154048 | 28154063 | 28154068 | 28154074 | 28154081 | 28154091 | 28154095 | 28154176 | 28154188 | 28154201 |
| <1       | <1       | <1       | <1       | <1       | <1       | <1       | <1       | <1       | <1       | <1       | <1       |
| <1       | <1       | <1       | <1       | <1       | <1       | <1       | <1       | <1       | <1       | <1       | <1       |
| <1       | <1       | <1       | <1       | <1       | <1       | <1       | <1       | <1       | <1       | <1       | <1       |
| <1       | <1       | <1       | <1       | <1       | <1       | <1       | <1       | <1       | <1       | <1       | <1       |
| <1       | <1       | <1       | <1       | <1       | <1       | <1       | <1       | <1       | <1       | <1       | <1       |
| <1       | 1.59     | <1       | <1       | <1       | <1       | <1       | <1       | <1       | <1       | <1       | <1       |
| 8.72     | 11.13    | 8.04     | 10.79    | 10.52    | 15.15    | 19.18    | 15.33    | 13.85    | 5.93     | 5.16     | 7.42     |
| 5.57     | 7.52     | 6.15     | 10.79    | 10.62    | 11.52    | 15.51    | 12.53    | 10.69    | 5.05     | 5.97     | 9.07     |
| 7.23     | 8.54     | 7.95     | 13.42    | 12.36    | 16.40    | 23.44    | 16.08    | 13.44    | 7.14     | 8.93     | 9.98     |
| 7.17     | 9.06     | 7.38     | 11.66    | 11.17    | 14.36    | 19.38    | 14.65    | 12.66    | 6.04     | 6.69     | 8.82     |
| 2.02     | 6.66     | 5.85     | 4.34     | 6.64     | 9.36     | 12.85    | 6.61     | 9.57     | 5.76     | 5.15     | 7.31     |
| 8.78     | 13.70    | 11.76    | 11.57    | 13.56    | 10.00    | 22.64    | 11.54    | 6.67     | 8.47     | 8.47     | 11.86    |
| 3.47     | 5.16     | 4.44     | 7.18     | 9.18     | 9.70     | 16.07    | 12.05    | 12.20    | 7.72     | 8.04     | 9.79     |
| 4.76     | 8.50     | 7.35     | 7.70     | 9.79     | 9.69     | 17.19    | 10.07    | 9.48     | 7.32     | 7.22     | 9.65     |
| 0.344    | 0.854    | 0.992    | 0.157    | 0.550    | 0.034    | 0.584    | 0.089    | 0.166    | 0.274    | 0.748    | 0.613    |

promoter

| 131      | 132      | 133      | 134      | 135      | 136      | 137      | 138      | 139      | 140      | 141      | 142      |
|----------|----------|----------|----------|----------|----------|----------|----------|----------|----------|----------|----------|
| 28154212 | 28154217 | 28154226 | 28154258 | 28154264 | 28154267 | 28154273 | 28154301 | 28154303 | 28154317 | 28154322 | 28154336 |
| <1       | <1       | <1       | 9.49     | <1       | <1       | <1       | <1       | <1       | <1       | <1       | <1       |
| <1       | <1       | <1       | <1       | <1       | <1       | 1.75     | <1       | <1       | <1       | <1       | <1       |
| 1.21     | <1       | <1       | <1       | <1       | <1       | <1       | <1       | <1       | <1       | <1       | <1       |
| <1       | <1       | <1       | <1       | <1       | <1       | <1       | <1       | <1       | <1       | <1       | <1       |
| <1       | <1       | <1       | <1       | <1       | <1       | <1       | <1       | <1       | <1       | <1       | <1       |
| <1       | <1       | <1       | <1       | <1       | <1       | <1       | <1       | <1       | <1       | <1       | <1       |
| 8.12     | 9.43     | 6.55     | 9.51     | 16.07    | 10.26    | 11.85    | 5.93     | 7.78     | 6.96     | 4.61     | 4.47     |
| 9.75     | 9.79     | 4.75     | 7.93     | 12.94    | 8.70     | 10.21    | 5.12     | 8.33     | 7.11     | 3.26     | 6.17     |
| 8.17     | 9.72     | 6.91     | 11.12    | 18.01    | 12.17    | 14.29    | 5.23     | 7.77     | 9.40     | 4.58     | 4.42     |
| 8.68     | 9.65     | 6.07     | 9.52     | 15.67    | 10.38    | 12.12    | 5.42     | 7.96     | 7.82     | 4.15     | 5.02     |
| 6.87     | 7.73     | 3.29     | 9.80     | 11.51    | 9.30     | 10.09    | 5.94     | 5.94     | 4.78     | 2.27     | 4.47     |
| 16.98    | 16.67    | 13.92    | 12.45    | 12.45    | 9.83     | 11.35    | 6.75     | 6.75     | 5.68     | 2.06     | 5.21     |
| 8.75     | 8.37     | 3.49     | 11.18    | 15.68    | 8.83     | 11.33    | 6.48     | 7.86     | 6.38     | 3.75     | 4.60     |
| 10.87    | 10.92    | 6.90     | 11.15    | 13.22    | 9.32     | 10.92    | 6.39     | 6.85     | 5.61     | 2.69     | 4.76     |
| 0.526    | 0.680    | 0.827    | 0.246    | 0.275    | 0.369    | 0.394    | 0.049    | 0.130    | 0.074    | 0.104    | 0.696    |

**TALE Target**

| 143      | 144      | 145      | 146      | 147      | 148      | 149      | 150      | 151      | 152      | 153      | 154      |
|----------|----------|----------|----------|----------|----------|----------|----------|----------|----------|----------|----------|
| 28154347 | 28154351 | 28154413 | 28154421 | 28154423 | 28154426 | 28154453 | 28154472 | 28154476 | 28154483 | 28154485 | 28154490 |
| <1       | <1       | <1       | <1       | <1       | <1       | <1       | <1       | <1       | <1       | <1       | <1       |
| <1       | <1       | <1       | <1       | <1       | <1       | <1       | <1       | <1       | <1       | <1       | <1       |
| <1       | <1       | <1       | <1       | <1       | <1       | <1       | <1       | <1       | <1       | <1       | <1       |
| <1       | <1       | <1       | <1       | <1       | <1       | <1       | <1       | <1       | <1       | <1       | <1       |
| <1       | <1       | <1       | <1       | <1       | <1       | <1       | <1       | <1       | <1       | <1       | <1       |
| <1       | <1       | <1       | <1       | <1       | <1       | <1       | <1       | <1       | <1       | <1       | <1       |
| 4.43     | 3.35     | 4.69     | 22.65    | 19.62    | 15.20    | 13.30    | 11.40    | 7.42     | 4.56     | 5.44     | 15.15    |
| 3.74     | 4.01     | 3.90     | 15.25    | 13.85    | 12.17    | 10.48    | 11.20    | 6.70     | 4.53     | 3.29     | 14.45    |
| 2.84     | 4.62     | 3.62     | 17.95    | 14.74    | 13.82    | 10.77    | 10.88    | 8.10     | 3.50     | 3.73     | 17.03    |
| 3.67     | 3.99     | 4.07     | 18.62    | 16.07    | 13.73    | 11.52    | 11.16    | 7.41     | 4.20     | 4.15     | 15.54    |
| 5.41     | 5.18     | 3.02     | 8.03     | 8.03     | 6.61     | 5.47     | 7.99     | 5.74     | 2.30     | 4.83     | 10.47    |
| 7.14     | 5.40     | 5.73     | 3.77     | 3.77     | 4.69     | 4.35     | 9.64     | 5.29     | 2.34     | 3.91     | 11.57    |
| 3.91     | 3.96     | 4.47     | 14.83    | 11.88    | 10.57    | 7.68     | 9.04     | 8.70     | 2.21     | 4.32     | 16.49    |
| 5.49     | 4.85     | 4.41     | 8.88     | 7.89     | 7.29     | 5.83     | 8.89     | 6.58     | 2.28     | 4.35     | 12.85    |
| 0.156    | 0.216    | 0.712    | 0.066    | 0.050    | 0.029    | 0.013    | 0.011    | 0.509    | 0.005    | 0.791    | 0.250    |

| 155      | 156      | 157      | 158      | 159      | 160      |
|----------|----------|----------|----------|----------|----------|
| 28154498 | 28154517 | 28154519 | 28154523 | 28154528 | 28154536 |
| <1       | <1       | <1       | <1       | <1       | <1       |
| <1       | <1       | <1       | 1.07     | <1       | <1       |
| <1       | <1       | <1       | <1       | <1       | <1       |
| <1       | <1       | <1       | <1       | <1       | <1       |
| <1       | <1       | <1       | <1       | <1       | <1       |
| <1       | <1       | <1       | <1       | <1       | <1       |
| 3.91     | 5.53     | 2.22     | 4.05     | 10.97    | 5.73     |
| 3.86     | 4.49     | 2.70     | 5.72     | 8.63     | 5.88     |
| 4.79     | 4.95     | 2.40     | 4.11     | 10.31    | 4.43     |
| 4.19     | 4.99     | 2.44     | 4.62     | 9.97     | 5.35     |
| 3.54     | 5.35     | 2.26     | 4.54     | 8.80     | 5.41     |
| 4.37     | 3.28     | 3.07     | 7.93     | 12.68    | 4.71     |
| 4.11     | 1.70     | 1.39     | 3.48     | 8.92     | 3.63     |
| 4.01     | 3.44     | 2.24     | 5.32     | 10.13    | 4.58     |
| 0.673    | 0.232    | 0.712    | 0.658    | 0.918    | 0.331    |



**Supplementary Table 2. Primers used for bisulfite sequencing of *Ascl1***

| Primer name           | Sequence                             | Tm |
|-----------------------|--------------------------------------|----|
| RatAscl1_3UTR_forward | TGAAGTGTATTTGTTTTAAAGTTTATTTTAGTAGGG |    |
| RatAscl1_3UTR_reverse | AAATCAACRACCAAACAAATCAAAC            | 56 |
| RatAscl1_Exon2_F      | ATATGTTTTYGGAGGGTGGTAAAGTTTAGG       |    |
| RatAscl1_Exon2_R      | CCRAAACTAATTTCTCCCCTCTTC             | 58 |
| RatAscl1_exon1_F      | TTAGGGGAYGTAGAGAGTTAGAAGGAAG         |    |
| RatAscl1_exon1_R      | CAACCRCCCAACACTCTCTCACTTCTAAC        | 60 |
| RatAscl1_promoter_F   | TTAYGTTTTTTGGTTAGAAGTGAGAGAGTGTTGGG  |    |
| RatAscl1_promoter_R   | CTTCCCTCCAAACTTTCTACCTAAAAACCCAAATC  | 60 |

**Supplementary Table 3: PCR primers to incorporate the inserts into the vector. The restriction sites are highlighted in green, HA tag is represented in blue font, and sequences complementary to the inserts are presented in black font.**

| Insert          | Forward                                                                   | Reverse                                         |
|-----------------|---------------------------------------------------------------------------|-------------------------------------------------|
| <b>TALE</b>     | acttaaGGATCCgccaccATGTACCCATACGATGT<br>TCCAGATTACGCTTCGCGGACCCGGCTCCCTTCC | cgatgcGCTAGCTGACGCGCGAGTTTGGTCCCCCT<br>TCATGCAT |
| <b>TET1CD</b>   | cgatgcGGTACCGccaccATGGAACTGCCACCTG<br>CAGCTGTCTTGATC                      | acttaaGGATCCGACCCAATGGTTATAGGGCCCC              |
| <b>DNMT3ACD</b> | cgatgcGGTACCGccaccATGCCAGCTGAGAAGAG<br>GAAGCCCATCC                        | acttaaGGATCCCACACAAGCAAAATATTCCTTC<br>AG        |

**Supplementary Table 4: Primers used in this study for sequencing the TALE fusion-proteins**

| TALE1-CIB1-mCherry fusion protein |                     |                 |                        |
|-----------------------------------|---------------------|-----------------|------------------------|
| Primer name                       | Sequence (5' to 3') | Primer name     | Sequence (3' to 5')    |
| <b>TALE_SP1</b>                   | GAGGGGTTTTATGCGATG  | <b>TALE_SP4</b> | TGCCACTCGATGTGATGTCCTC |

|                                                   |                         |                 |                         |
|---------------------------------------------------|-------------------------|-----------------|-------------------------|
| <b>TALE_SP2</b>                                   | CCAGTTGCTGAAGATCGCGAAGC | <b>TALE_SP5</b> | CCCTCCCGTAATCATAGA      |
| <b>TALE_SP3</b>                                   | ACTTACACCCGAACAAGTCG    | <b>TALE_SP6</b> | AAAGGCATTAAAGCAGCGTATCC |
| <b>TET1CD-CRY2PHR-EGFP (TCE) fusion-protein</b>   |                         |                 |                         |
| <b>TCE_SP1</b>                                    | GAGGGGTTTTATGCGATG      | <b>TCE_SP3</b>  | GAGTGTGCCCGGCGAGAG      |
| <b>TCE_SP2</b>                                    | ACCAGCCCTCCTTCCTCAC     | <b>TCE_SP4</b>  | CAGATAAAGACAGGGAATACCG  |
| <b>DNMT3ACD-CRY2PHR-EGFP (DCE) fusion-protein</b> |                         |                 |                         |
| <b>DCE_SP1</b>                                    | GAGGGGTTTTATGCGATG      | <b>DCE_SP3</b>  | CGGTATTCCTGTCTTTATCTG   |
| <b>DCE_SP2</b>                                    | ATGACCTCTCCATTGTCAAC    | <b>DCE_SP4</b>  | GCTCGGCAGTGACGCCCTT     |

**Supplementary Table 5: Primers used in this study for bisulfite conversion PCR (BSP) of *Ascl1***

| Region                | Forward                              | Reverse                | Product size (bp) | Tm |
|-----------------------|--------------------------------------|------------------------|-------------------|----|
| <i>Ascl1</i> promoter | 5' -/5BiosG<br>/GGGAGGTTGTAGTTTTATTT | ATTTCTAAAACCACCCCCTAAC | 216               | 57 |
| <i>Ascl1</i> exon     | Qiagen Assay # PM00574812            |                        | 85                | 50 |

**Supplementary Table 6: Analyzed sequence and the sequencing primers for pyrosequencing; all primers listed are 5' to 3'**

| Region                | Sequenced CpG region                      | Sequencing primer (5' to 3') |
|-----------------------|-------------------------------------------|------------------------------|
| <i>Ascl1</i> promoter | RACTAAATAAAAAATTTACA<br>AAAAACCRACRCAACAA | ACTACAACAACAACCC             |
| <i>Ascl1</i> Exon     | TTYGGGAGTATGTTTTTAA<br>YGGYGT             | N/A                          |

Y/R (complement of Y) are the potential methylated cytosines at the target CpG sites.

**Supplementary sequence-1: TALE-1 (*Ascl1*)-CIB1-mCherry (~173.24 kD)**



SPYALTHVAGPYNHVWGSATMKRPAATKKAGQAKKKKMDKKTIVWFRRDLRIEDNPALAAAHE  
GSVFPVFIWCPEEEGQFY PGRASRWMKQSLAHLSQLKALGSDLTLIKTHNTISAILDCIRVT  
GATKVVFNHLYDPVSLVRDHTVKEKLVVERGISVQSYNGDLLYEPWEIYCEKGPFTSFNSYWKK  
CLDMSIESVMLPPPWRMLPITAAAEAIWACSI EELGLENEAEKPSNALLTRAWSPGWSNADKLL  
NEFIEKQLIDYAKNSKKVVGNSTSLLSPYLHFGEISVRHV FQCARMKQI IWARDKNSEGEESAD  
LFLRGIGLREYSRYICFNFPFTHEQSLLSHLRFFPWDADVDKFKAWRQGRTGYPLVDAGMRELW  
ATGWMHNRIRVIVSSFAVKFLLL PWKGMKYFWDTL DADLECDILGWQYISGSI PDGHELDRL  
DNPALQGAKYDPEGEYIRQWLPELARLPTEWIHHPWDAPLTVLKASGVELGTNYAKPIVDIDTA  
RELLAKAISRTREAQIMIGAAPASSPKKKR KVEASGSGRADALDDFDLMLGSDALDDFDLML  
GSDALDDFDLMLGSDALDDFDLMLINSRGSGEGRGSL LTCGDVEENPGPVSKGEELFTGVVP  
ILVELDGDVNGHKFSVS GEGEGDATYGKLT LKFICTTGKLPVPWPPTLVTTLT YGVQCFSRYPDH  
MKQHDFFKSAMPEGYVQERTIFFKDDGNYKTRAEVKFEGDTLVNRIELK GIDFKEDGNILGHKL  
EYNYNSHNVYIMADKQKNGIKVNFKIRHNI EDGSVQLADHYQQNTPIGDGPVLLPDNHYLSTQS  
ALSKDPNEKRDMVLLLEFVTAAGITLGMDELYK\*

**Supplementary sequence-3: DNMT3ACD-linker-importin  $\alpha$ NLS-CRY2PHR-NLS-  
VP64AD-2A-EGFP (128.67 kD)**

MPAEKRKPIRVLSLFDGIATGLLV LKDLGIQVDRYIASEVCEDSITVGMVRHQGKIMYVGDVRS  
VTQKHIQEWGPFDLVIGGSPCNDLSIVN PARKGLYEGTGRLFFEFYRLLHDARPKEGDRPFFW  
LFENVVAMGVSDKRDISRFLESNPVMI DAKEVSAHRARYFWGNLPGMNRPLASTVNDKLELQE  
CLEHGRIAKFSKVRTITTRSNSIKQ GKDQHFVFMNEKEDILWCTEMERVFVGFVHYTDVSNMS  
RLARQRLGRSWSVPVIRHLFAPLKEYFACVGSATMKRPAATKKAGQAKKKKMDKKTIVWFRRD  
LRIEDNPALAAAHEGSVFPVFIWCPEEEGQFY PGRASRWMKQSLAHLSQLKALGSDLTLIK  
THNTISAILDCIRVTGATKVVFNHLYDPVSLVRDHTVKEKLVVERGISVQSYNGDLLYEPWEIYC  
EKGPFTSFNSYWKKCLDMSIESVMLPPPWRMLPITAAAEAIWACSI EELGLENEAEKPSNALL  
TRAWSPGWSNADKLLNEFIEKQLIDYAKNSKKVVGNSTSLLSPYLHFGEISVRHV FQCARMKQI  
IWARDKNSEGEESADLFLRGIGLREYSRYICFNFPFTHEQSLLSHLRFFPWDADVDKFKAWRQG  
RTGYPLVDAGMRELWATGWMHNRIRVIVSSFAVKFLLL PWKGMKYFWDTL DADLECDILGWQ  
YISGSI PDGHELDRLDNPALQGAKYDPEGEYIRQWLPELARLPTEWIHHPWDAPLTVLKASGVE  
LGTNYAKPIVDIDTARELLAKAISRTREAQIMIGAAPASSPKKKR KVEASGSGRADALDDFDL  
MLGSDALDDFDLMLGSDALDDFDLMLGSDALDDFDLMLINSRGSGEGRGSL LTCGDVEENP  
GPVSKGEELFTGVVPIILVELDGDVNGHKFSVS GEGEGDATYGKLT LKFICTTGKLPVPWPPTLV  
TLYGVQCFSRYPDHMKQHDFFKSAMPEGYVQERTIFFKDDGNYKTRAEVKFEGDTLVNRIELK  
GIDFKEDGNILGHKLE YNYNSHNVYIMADKQKNGIKVNFKIRHNI EDGSVQLADHYQQNTPIGD  
GPVLLPDNHYLSTQSALSKDPNEKRDMVLLLEFVTAAGITLGMDELYK\*
